# Supplementary material for: Perilla seed oil in combination with nobiletin-rich ponkan powder enhances cognitive function in healthy elderly Japanese individuals: a possible supplement for brain health in the elderly
Source: Royal Society of Chemistry journal article supplement (doi:10.1039/d1fo03508h), 2022-01-01
Supplement: d1fo03508h1.pdf [file d1fo03508h1.pdf]

Report No. HRA0000105-002

Report issue date January 27, 2015

## CERTIFICATE OF ANALYSIS

Food Sanitation Law registered inspection agency  
(Ministry of Health, Labor and Welfare No. 1027001)

Ikata Service Co., Ltd.

(Request number)

367270

(Sample name)

Air dried immature ponkan powder 140806

**Hiyoshi Corporation**

908 Kitanosho, Omihachiman, Shiga 523-8555

TEL0748-32-5001 Fax0748-32-4192

This is to certify that the following results have been obtained from our analysis on the above-mentioned samples submitted by the client in January 6, 2015..

| Test item   | Results     | Quantitation limit | Method                 | Notes |
|-------------|-------------|--------------------|------------------------|-------|
| Hesperidin  | 16g/100g    | —                  | HPLC                   |       |
| Nobiletin   | 260mg/100g  | —                  | HPLC                   |       |
| Narirutin   | 1.2g/100g   | —                  | HPLC                   |       |
| Polyphenol  | 4100mg/100g | —                  | Folin-Ciocalteu method | 1)    |
| blank below |             |                    |                        |       |
|             |             |                    |                        |       |
|             |             |                    |                        |       |
|             |             |                    |                        |       |

### Notes

1) The coloration of vitamin C in the sample was subtracted by the foreign thiocult method.

I certify that this ingredient list is an accurate translation of the Japanese ingredient list created by the manufacturer of Ponkan powder used in this interventional study into English.

Signature Koji Maruyama Date: Dec. 20, 2021

Koji Maruyama

Chief Department of Research and Development Sankyo Holdings Co., Ltd.

e-mail: [maruyama@sankyocoltd.co.jp](mailto:maruyama@sankyocoltd.co.jp)

Tell: +81 545 22 2558 Fax: +81 545 22 2525

## CERTIFICATE OF ANALYSIS

Food Sanitation Law registered inspection agency  
(Ministry of Health, Labor and Welfare No. 1027001)

Ikata Service Co., Ltd.

(Request number)  
367269

(Sample name)

Air dried immature ponkan powder 140806

Hiyoshi Corporation

908 Kitanosho, Omihachiman, Shiga 523-8555  
TEL0748-32-5001 Fax0748-32-4192

This is to certify that the following results have been obtained from our analysis on the above-mentioned samples submitted by the client in January 6, 2015..

| Test item   | Results      | Quantitation limit | Method                              | Notes |
|-------------|--------------|--------------------|-------------------------------------|-------|
| Moisture    | 6.6g/100g    | —                  | Heating and drying method           |       |
| Protein     | 9.0g/100g    | —                  | Kjeldahl method                     | 1)    |
| Fat         | 2.1g/100g    | —                  | Acid degradation                    |       |
| Ash         | 3.7g/100g    | —                  | Direct incineration                 |       |
| Sodium      | 3mg/100g     | —                  | Atomic absorption spectrophotometry |       |
| Fiber       | 56.1g/100g   | —                  | Prosky method                       |       |
| Sugar       | 22.5g/100g   | —                  | —                                   | 2)    |
| Energy      | 257kcal/100g | —                  | Modified Atwater method             | 3)    |
| blank below |              |                    |                                     |       |
|             |              |                    |                                     |       |

### Notes

- 1) Nitrogen / protein conversion factor: 6.25
- 2) Carbohydrate: 100- (moisture + protein + fat + ash + fiber)
- 3) Modified atwater method: protein×4 + fat×9 + sugar×4 + fiber×2

I certify that this ingredient list is an accurate translation of the Japanese ingredient list created by the manufacturer of Ponkan powder used in this interventional study into English.

Signature Koji Maruyama Date: Dec. 20, 2021

Koji Maruyama

Chief Department of Research and Development Sankyo Holdings Co., Ltd.

e-mail: [maruyama@sankyocoltd.co.jp](mailto:maruyama@sankyocoltd.co.jp)

Tell: +81 545 22 2558 Fax: +81 545 22 2525
